Cite this article as: Bastos Filho JBB, Sampaio RO, Cividanes FR, Rosa VEE, da Costa LPN, Vieira MLC *et al.* Double transcatheter balloon-expandable valve implantation for severe valve dysfunction in high-risk patients: initial experience. *Interact CardioVasc Thorac Surg* 2020;31:461–6.

## Double transcatheter balloon-expandable valve implantation for severe valve dysfunction in high-risk patients: initial experience

João Bosco Breckenfeld Bastos Filho , Roney Orismar Sampaio , Felipe Reale Cividanes, Vitor Emer Egypto Rosa , Leonardo Paim Nicolau da Costa , Marcelo Luiz Campos Vieira, Fabio Biscegli Jatene, Flavio Tarasoutchi, José Honório Palma and Henrique Barbosa Ribeiro\*

Heart Institute of São Paulo (InCor), University of São Paulo, São Paulo, Brazil

\* Corresponding author. Heart Institute of São Paulo (InCor), University of São Paulo, Av. Dr. Enéas de Carvalho Aguiar 44, São Paulo - SP 05403-900, Brazil. Tel: +55-11-26615375; e-mail: henrique.ribeiro@hc.fm.usp.br (H.B. Ribeiro).

Received 26 February 2020; received in revised form 15 May 2020; accepted 6 July 2020

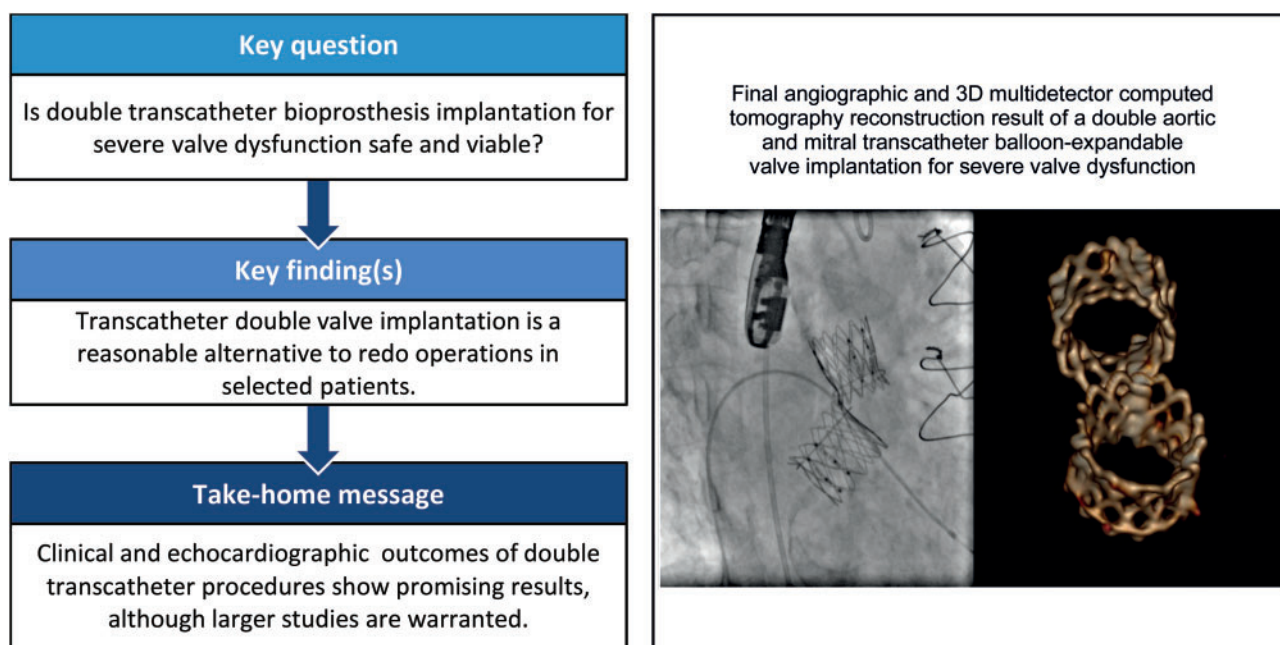

### Abstract

**OBJECTIVES:** Concomitant valvular heart valve disease is a frequent finding, with higher morbidity and mortality among patients undergoing redo surgical procedures. Our goal was to report our initial experience with combined transcatheter Inovare bioprosthesis implants for severe valve dysfunction.

**METHODS:** Among 300 transcatheter procedures, a total of 6 patients had concurrent simultaneous transcatheter bioprosthesis implants for severe mitral bioprosthesis failure (valve-in-valve), with a second valve procedure that included native aortic ( $n = 2$ ) or degenerated bioprostheses in the aortic position ( $n = 4$ ). During the procedures, all patients were treated with a balloon-expandable Inovare transcatheter valve, using the transapical approach.

**RESULTS:** Patients were highly symptomatic [New York Heart Association (NYHA) functional class IV: 100%], with a mean age of  $62 \pm 5$  years, yielding a mean European System for Cardiac Operative Risk II (EuroSCORE II) of  $24.0 \pm 10.1\%$ . There was a mean of  $1.6 \pm 0.4$  prior valve operations/patient, with a median time from prior mitral bioprosthesis surgery of 13.0 (9.2–20.0) years. Device success was 100% according to the Mitral Valve Academic Research Consortium and the Valve Academic Research Consortium-2 criteria. During the hospital stay, only 1 patient required dialysis, and the median intensive care unit and hospital lengths of stay were 5.0 (3.2–6.7) days and 16.0 (12.2–21.2) days, respectively. No deaths occurred at 30 days; at a median follow-up of 287 (194–437) days, 1 patient died of a non-cardiac cause and the rest of patients were in NYHA functional class I or II, with normofunctioning bioprostheses.

**CONCLUSIONS:** Transcatheter double valve interventions using the Inovare bioprosthesis in this initial series were shown to be a reasonable alternative to redo surgical operations. The short- and mid-term clinical and echocardiographic outcomes demonstrate promising results, although future studies with a larger number of patients and longer follow-up are warranted.

**Keywords:** Transcatheter aortic valve implantation • Prior surgical bioprosthesis • Redo operation • Valve-in-valve

## ABBREVIATIONS

|      |                                            |
|------|--------------------------------------------|
| CT   | Computed tomography                        |
| LVOT | Left ventricular outflow tract obstruction |
| NYHA | New York Heart Association                 |
| VIR  | Valve-in-ring                              |
| VIV  | Valve-in-valve                             |

## INTRODUCTION

Concomitant valvular heart valve disease is a frequent finding, especially given the increasing age of the population. It may affect as many as 11% of patients undergoing valvular heart surgery [1]. Also, in countries where rheumatic valve disease is still prevalent, the incidence of simultaneous severe multivalvular disease requiring surgical intervention is even higher, representing  $\sim 20\%$  of the procedures [2, 3]. Importantly, these patients undergo multiple valvular procedures, which puts them at higher risk of morbidity and mortality. For instance, simultaneous aortic and mitral surgery mortality rates are between 5% and 13%, whereas an isolated aortic valve replacement generally causes severe complications in  $<4\%$  of patients [4–6].

Transcatheter valve interventions have been established as an alternative to surgical interventions in recent years, initially for patients with severe aortic stenosis deemed inoperable or at high or intermediate surgical risk. More recently, this procedure has been evaluated in patients with bioprosthetic valve failure [valve-in-valve (VIV)] in aortic, mitral and tricuspid positions [7–9], as well as in those with pure native aortic regurgitation [10], among other indications. Therefore, although interest in simultaneous procedures during the same intervention has grown lately, experience is still limited and is restricted to case reports, small case series and only certain types of transcatheter valves [7, 9, 11–16]. Our goal was to report our initial experience with combined transcatheter Inovare bioprosthesis implants for severe valve dysfunction.

## METHODS

Ours was a single-centre registry that included consecutive patients who had simultaneous transcatheter procedures from January 2015 to March 2019. A total of 300 transcatheter valves were implanted at our centre during this period, and 6 patients had concurrent combined transcatheter bioprosthesis implants for severe mitral bioprosthesis failure, with a second valve that included native or degenerated bioprostheses in the aortic

position. During the procedures, all patients were treated with a balloon-expandable Inovare bioprosthesis (Braile Biomédica<sup>®</sup>, São José do Rio Preto, Brazil), made of a cobalt-chromium alloy and bovine pericardium, using the transapical approach [17]. The Inovare system includes a wide range of diameters; more vertices in the lozenge frame (for better force distribution and annulus accommodation); and a single pericardial sheet for all leaflets (reducing the number of pericardial sutures) [18, 19]. The main procedural steps are shown in the Video 1 [18, 19].

This study was approved by the institutional ethics committee; informed consent for the procedure was obtained from all patients.

All of the included patients had severe double valve dysfunction that could include severe stenosis, regurgitation or both, and were in New York Heart Association (NYHA) functional class  $>2$ . They underwent gated computed tomography (CT) evaluation for annulus or bioprosthetic ring assessment and transoesophageal echocardiography for proper valve dysfunction analysis [20]. In addition, the potential for left ventricular outflow tract obstruction (LVOT) was also evaluated before the procedure as previously described [21, 22].

Gathered data included baseline clinical, echocardiographic and CT characteristics. Procedural data included the type and size of the transcatheter bioprosthesis and the approach, and the clinical events were defined according to the Mitral Valve Academic Research Consortium criteria and the Valve Academic Research Consortium-2 criteria, depending on the procedure

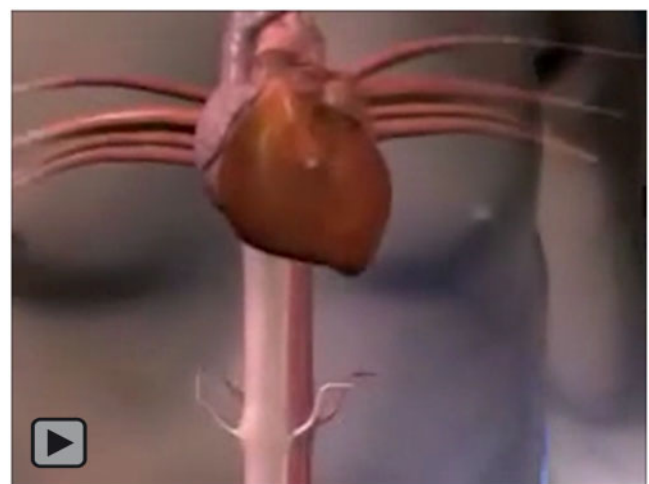

**Video 1:** Procedural steps for double transcatheter balloon-expandable valve implantation for severe valve dysfunction in aortic and mitral position, in a high-risk patients using the transapical approach.

[23, 24]. Finally, data regarding in-hospital and 1-year mortality were also included in the analysis.

Categorical variables were reported as *n* (%), and continuous variables as the mean  $\pm$  standard deviation. All analyses were conducted using the statistical package SPSS (version 20.0. IBM Corp., Armonk, NY, USA).

## RESULTS

The main baseline clinical, echocardiographic and procedural characteristics are presented in Table 1 (mean data) and Table 2 (individual data). All patients were highly symptomatic with NYHA functional class IV (100%). The mean age was  $62 \pm 5$  years and half were men (50%). Only 1 patient had no definite aetiology, whereas the others had chronic rheumatic disease (83.3%).

**Table 1** Baseline clinical, echocardiographic and procedural characteristics of the study population

| Clinical variables                                  | Values (n = 6)  |
|-----------------------------------------------------|-----------------|
| Age (years), mean $\pm$ SD                          | 62 $\pm$ 5      |
| Male gender, n (%)                                  | 3 (50)          |
| NYHA functional class IV, n (%)                     | 6 (100)         |
| Previous CABG, n (%)                                | 1 (16.6)        |
| Atrial fibrillation, n (%)                          | 6 (100)         |
| Rheumatic disease, n (%)                            | 5 (83.3)        |
| Previous operations, mean $\pm$ SD                  | 1.6 $\pm$ 0.4   |
| Post-mitral valve replacement (years), median (IQR) | 13.0 (9.2–20.0) |
| EuroSCORE II (%), mean $\pm$ SD                     | 24.0 $\pm$ 10.1 |
| Echocardiographic variables                         |                 |
| LVEF (%), mean $\pm$ SD                             | 59 $\pm$ 6      |
| Mean aortic gradient (mmHg), mean $\pm$ SD          | 37 $\pm$ 12     |
| Max aortic gradient (mmHg), mean $\pm$ SD           | 67 $\pm$ 17     |
| Mean mitral gradient (mmHg), mean $\pm$ SD          | 13.5 $\pm$ 3.8  |
| Moderate/severe mitral regurgitation, n (%)         | 3 (50)          |
| Moderate/severe tricuspid regurgitation, n (%)      | 4 (66.7)        |
| PSAP (mmHg), mean $\pm$ SD                          | 78 $\pm$ 16     |
| Procedural data, n (%)                              |                 |
| Simultaneous THV type <sup>a</sup>                  |                 |
| VIV aortic                                          | 4 (66.7)        |
| Native aortic                                       | 2 (33.3)        |

<sup>a</sup>All patients underwent simultaneous mitral VIV procedure.

CABG: coronary artery bypass graft; EuroSCORE II: European System for Cardiac Operative Risk Evaluation II; IQR: interquartile range; LVEF: left ventricular ejection fraction; NYHA: New York Heart Association; PSAP: pulmonary systolic arterial pressure; SD: standard deviation; THV: transcatheter heart valve; VIV: valve-in-valve.

There was a mean of  $1.6 \pm 0.4$  prior valve operations/patient (ranging from 1 to 2); and for a degenerated mitral bioprosthesis, the median time from prior surgery was 13.0 (9.2–20.0) years (range 8–20 years). The mean European System for Cardiac Operative Risk II (EuroSCORE II) was  $24.0 \pm 10.1\%$ .

In all patients the transapical access was used. The transapical approach was used for treatment of both mitral and aortic valves: 4 patients had double mitral and aortic VIV (Fig. 1), and 2 patients had native aortic stenosis and mitral bioprosthesis failure (Fig. 2 and Table 1).

Procedural results are shown in Table 3. Device success was 100% according to the Mitral Valve Academic Research Consortium criteria and Valve Academic Research Consortium-2 criteria. No deaths occurred intraprocedurally. Only 1 patient (16.7%) required postoperative dialysis; no other procedure-associated complications were recorded, including no cases of LVOT obstruction. The median intensive care unit and hospital lengths of stay after the procedure were 5.0 (3.2–6.7) days and 16.0 (12.2–21.2) days, respectively. No deaths occurred at 30 days; at a median follow-up period of 287 (194–437) days, 1 patient died of a non-cardiac cause (drug-induced fulminant hepatitis) and the rest of patients were in NYHA functional classes I–II. Individual patient follow-up days are shown in Supplementary Material, Table S1. Echocardiographic parameters at follow-up showed normofunctioning mitral bioprostheses with no mitral regurgitation and a mean gradient of  $7.0 \pm 2.3$  mmHg; the aortic bioprostheses were also normofunctioning, with trace or no paravalvular leak, and mean gradients of  $17.5 \pm 5.1$  mmHg. All patients received warfarin at hospital discharge because they had atrial fibrillation; no clinical leaflet thrombosis was noted during the follow-up period.

## DISCUSSION

The main findings of this initial series were that implantation of a simultaneous double transcatheter Inovare bioprosthesis for severe valve dysfunction, performed in this high-risk population, may be an alternative to conventional redo surgery, with acceptable short- and mid-term clinical and echocardiographic outcomes.

The presence of multivalvular heart disease is a frequent finding, given the ageing population and the prevalence of rheumatic disease in some countries [3, 25]. Likewise, with comorbidities and repeated procedures, the rates of morbidity and mortality

**Table 2** Individual data characteristics of the study population (n = 6)

| Patient (n = 6) | Age (years) | Sex    | Time since last surgery (years) | Previous CABG | Prior surgical valve procedures (N) | Euro SCORE II (%) | Approach | Order of intervention | Mitral bioprosthesis size | Simultaneous THV location | Other THV size |
|-----------------|-------------|--------|---------------------------------|---------------|-------------------------------------|-------------------|----------|-----------------------|---------------------------|---------------------------|----------------|
| 1               | 72          | Male   | 17                              | Yes           | 2                                   | 14.8              | TA       | M→A                   | 30                        | TAVI                      | 28             |
| 2               | 63          | Male   | 20                              | No            | 1                                   | 22.5              | TA       | A→M                   | 30                        | Aortic VIV                | 26             |
| 3               | 48          | Female | 10                              | No            | 2                                   | 13.3              | TA       | M→A                   | 28                        | Aortic VIV                | 20             |
| 4               | 60          | Male   | 16                              | No            | 2                                   | 38.9              | TA       | M→A                   | 30                        | Aortic VIV                | 22             |
| 5               | 62          | Female | 8                               | No            | 2                                   | 39.8              | TA       | A→M                   | 24                        | Aortic VIV                | 20             |
| 6               | 67          | Female | 9                               | No            | 1                                   | 15.8              | TA       | A→M                   | 26                        | TAVI                      | 26             |

A: aortic; CABG: coronary artery bypass graft; EuroSCORE II: European System for Cardiac Operative Risk Evaluation II; M: mitral; T: tricuspid; TA: transapical; TAVI: transcatheter aortic valve implantation; THV: transcatheter heart valve; VIV: valve-in-valve.

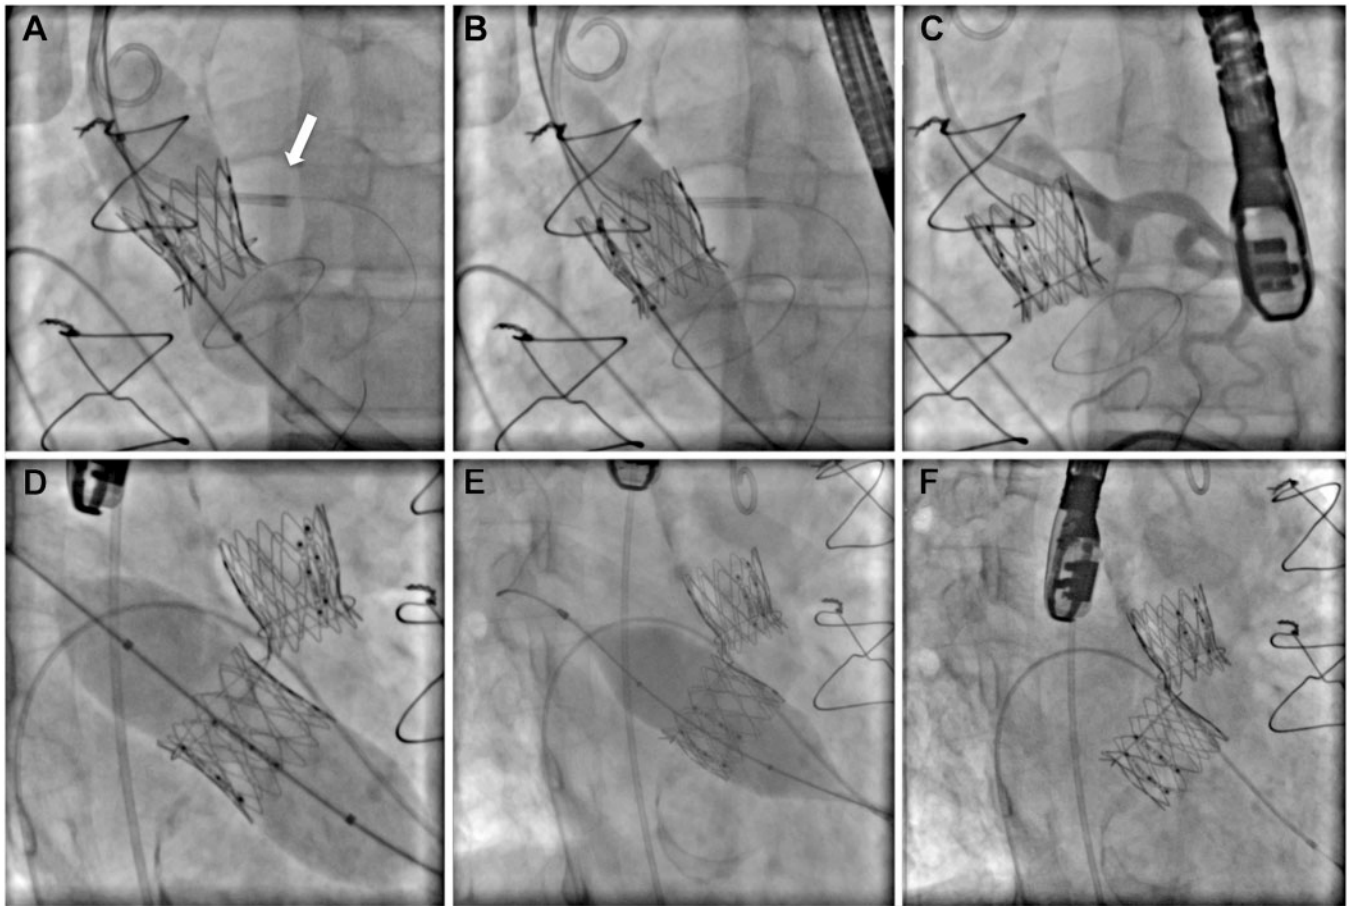

**Figure 1:** Case example of combined aortic and mitral valve-in-valve (VIV). Aortic VIV implantation with coronary wire protection (white arrow) (A). Non-compliant Atlas gold post-dilatation (B). Final result with normal coronary flow (C). Mitral VIV replacement (D). Non-compliant Atlas gold post-dilatation in the mitral position (E). Final result with both aortic and mitral transcatheter heart valve replacements (F).

are amplified up to five-fold compared to the replacement of a single valve [1, 3–5]. In this high-risk scenario, catheter-based valve implantation techniques have gradually become an alternative to standard redo surgical valve replacement for patients of different risk profiles, with good short- and mid-term results [8].

The so-called VIV procedures started in the aortic position and have rapidly expanded to mitral, tricuspid and pulmonary VIV procedures [7, 9]. The advantages of VIV implantation over conventional redo surgery are mainly related to the less invasive approach, which means shorter duration of the procedure and no need for mediastinal re-entry, cardiopulmonary bypass, aortic cross-clamping and removal of the failed valve [12]. The largest study to date evaluating VIV procedures is the Valve-in-Valve International Data Registry, which is a multinational comprehensive evaluation of transcatheter valve implants for failed surgical bioprostheses. In the aortic VIV subset of patients, the overall 30-day and 1-year mortality rates were 7.6% and 16.8%, respectively [8].

More recently, in a larger multicentre series including only transcatheter mitral valve replacements, a total of 521 patients were evaluated for mitral VIV and for failed annuloplasty rings [valve-in-ring (VIR)] [26]. The all-cause mortality was slightly higher for VIR versus VIV at 30 days (9.9% vs 6.2%) and at 1 year (30.6% vs 14.0%; adjusted hazard ratio 1.99, 95% confidence interval 1.27–3.12;  $P=0.003$ ). We have recently shown in a series of

the first 50 cases of mitral VIV overall 30-day and 1-year mortality rates of 12.9% and 26.3%, respectively, including only the transapical approach and the Inovare bioprosthesis, which are comparable to those in previously published reports [27].

Few data in the literature evaluate transcatheter combined valve interventions; most are isolated case reports and small case series, restricted to self-expandable and Sapien valves [5, 7, 12–14]. In a recent systematic review of the literature, a total of 19 cases were reported: 6 patients with a transcatheter aortic valve implant combined with a transcatheter mitral VIV or VIR and 13 patients with combined aortic and mitral VIV or VIR procedures [11]. In this study the reported mortality rates at 30 days and in the follow-up period (range 13 days–6 months) for transcatheter aortic valve implantation in association with mitral VIV or VIR were 0% and 17%, respectively [11]. Importantly, no deaths occurred at 30 days or in the follow-up period (range 6–365 days) for combined aortic and mitral VIV [11]. These mortality rates are compatible with the present results, where no intraprocedural deaths and no procedure-associated complications were recorded.

It is important to note that in the study by Ando *et al.* [11], 2 patients had moderate/severe paravalvular leak in the mitral position and 2 other patients had LVOT obstruction. Neither of these complications occurred in our initial series, which was similar to the results in a recent report of mitral VIV using the

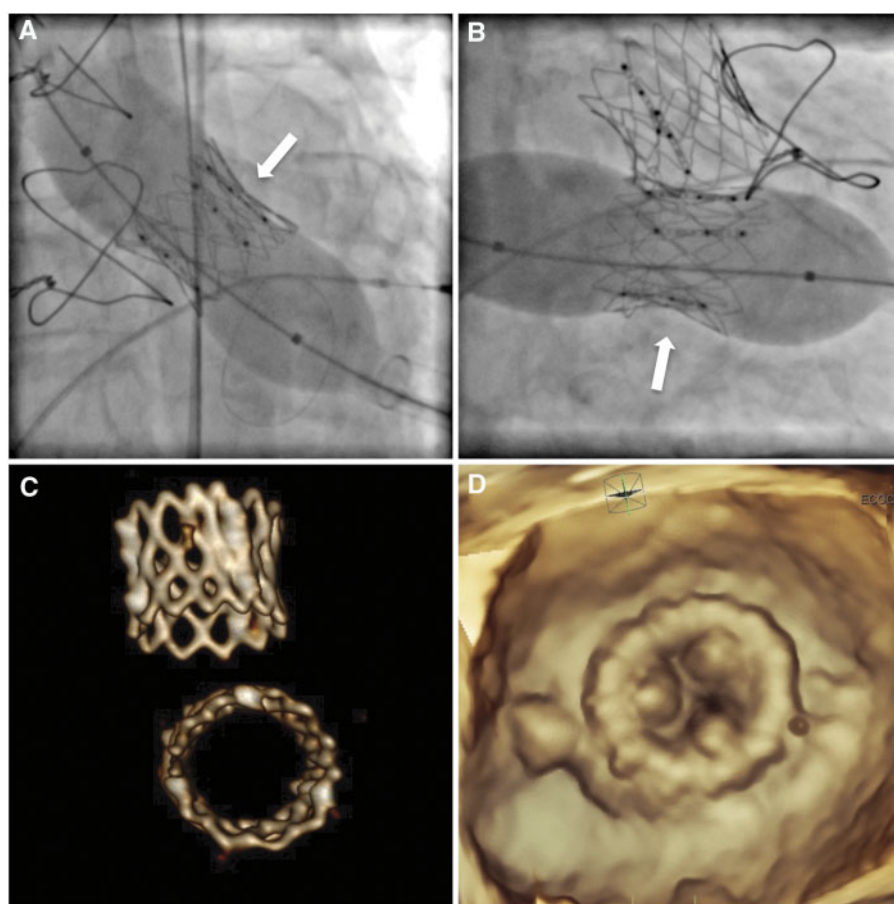

**Figure 2:** Case example of combined mitral valve-in-valve (VIV) and native aortic transcatheter aortic valve implantation (TAVI). TAVI was performed first (white arrow) (A), followed by the mitral VIV replacement (B). Three-dimensional multidetector computed tomography reconstruction showing both transcatheter heart valves implanted in aortic and mitral positions (C). Three-dimensional transoesophageal echocardiography reconstruction of the mitral transcatheter heart valve replacements (D).

**Table 3** Main 30-day outcomes ( $n = 6$ )

| Clinical outcomes                          | Number           |
|--------------------------------------------|------------------|
| Death                                      | 0                |
| Pacemaker                                  | 0                |
| Paravalvular leak                          | 0                |
| Vascular                                   | 0                |
| Bleeding                                   | 0                |
| Stroke                                     | 0                |
| Dialysis, $n$ (%)                          | 1 (16.7)         |
| ICU days, median (IQR)                     | 5.0 (3.2–6.7)    |
| Hospitalization days, median (IQR)         | 16.0 (12.2–21.2) |
| Echocardiographic variables                |                  |
| LVEF (%), mean $\pm$ SD                    | 59 $\pm$ 3.7     |
| Mean aortic gradient (mmHg), mean $\pm$ SD | 17.5 $\pm$ 5.1   |
| Mean mitral gradient (mmHg), mean $\pm$ SD | 7.0 $\pm$ 2.3    |
| Moderate/severe MI, $n$ (%)                | 1 (16.7)         |
| Moderate/severe TI, $n$ (%)                | 3 (50)           |
| PSAP, mean $\pm$ SD                        | 43.0 $\pm$ 15.6  |

ICU: intensive care unit; IQR: interquartile range; LVEF: left ventricular ejection fraction; MI: mitral insufficiency; PSAP: pulmonary systolic arterial pressure; SD: standard deviation; TI: tricuspid insufficiency.

Inovare bioprosthesis [27]. On the contrary, LVOT obstruction ensued in 2.2% and 5.0% after VIV and VIR, respectively, in a larger cohort of patients [26]. Finally, different strategies in the combined transcatheter heart valve implantation were used. The

decision about the sequence in which the valve replacement should be performed in the first place was based on the type of dysfunction and on its severity; in general, the priority was to treat the more severe stenosis first. Yet, the best approach and order of implantation are unknown due to the limited number of cases in the literature.

### Limitations

This study has several limitations. It was a single-centre registry that, although it included all consecutive patients, had a limited number of patients and a short follow-up period. Also, the small number of patients precludes an analysis of the different combinations of transcatheter procedures involving the different valves. The median procedural time was not available for this analysis. Finally, the transfemoral approach was recently shown to be associated with improved outcomes compared with alternative approaches such as the transapical, which was the only one used in the present study. Therefore, future studies should be performed using the transfemoral access in combined procedures.

### CONCLUSION

In conclusion, transcatheter double valve interventions using the balloon-expandable Inovare bioprosthesis in this initial series

appear to be a reasonable alternative to redo surgical operations. The short- and mid-term clinical and echocardiographic outcomes show promising results, although future studies with a larger number of patients and longer follow-up period are warranted.

## SUPPLEMENTARY MATERIAL

Supplementary material is available at *ICVTS* online.

**Conflict of interest:** José Honório Palma is proctor and consultant for Braile Biomédica. Henrique Barbosa Ribeiro is proctor and consultant for Edwards Lifesciences, Medtronic and Boston Scientific. All other authors declared no conflict of interest.

## Author contributions

**João Bosco Breckenfeld Bastos Filho:** Conceptualization; Data curation; Formal analysis; Methodology; Project administration; Resources; Supervision; Validation; Visualization; Writing—original draft; Writing—review & editing. **Roney Orismar Sampaio:** Conceptualization; Data curation; Formal analysis; Methodology. **Felipe Reale Cividanes:** Investigation. **Vitor Emer Egypto Rosa:** Conceptualization; Investigation; Methodology; Supervision. **Leonardo Paim Nicolau da Costa:** Data curation; Formal analysis. **Marcelo Luiz Campos Vieira:** Project administration; Resources; Software; Visualization. **Fabio Biscegli Jatene:** Project administration; Resources; Supervision. **Flavio Tarasoutchi:** Formal analysis; Resources; Supervision; Validation. **José Honório Palma:** Conceptualization; Data curation; Formal analysis; Investigation; Methodology; Project administration; Resources; Supervision; Visualization; Writing—review & editing. **Henrique Barbosa Ribeiro:** Conceptualization; Data curation; Investigation; Methodology; Project administration; Supervision; Writing—original draft; Writing—review & editing.

## Reviewer information

Interactive CardioVascular and Thoracic Surgery thanks Mizuki Miura, Stefano Salizzoni, Matheus Simonato and the other, anonymous reviewer(s) for their contribution to the peer review process of this article.

## REFERENCES

- Lee R, Li S, Rankin JS, O'Brien SM, Gammie JS, Peterson ED *et al.* Fifteen-year outcome trends for valve surgery in North America. *Ann Thorac Surg* 2011;91:677–84; discussion 684.
- Choudhary SK, Dhareshwar J, Govil A, Airan B, Kumar AS. Open mitral commissurotomy in the current era: indications, technique, and results. *Ann Thorac Surg* 2003;75:41–6.
- Ribeiro GS, Tartof SY, Oliveira DW, Guedes AC, Reis MG, Riley LW *et al.* Surgery for valvular heart disease: a population-based study in a Brazilian urban center. *PLoS One* 2012;7:e37855.
- Brown PS Jr, Roberts CS, McIntosh CL, Swain JA, Clark RE. Relation between choice of prostheses and late outcome in double-valve replacement. *Ann Thorac Surg* 1993;55:631–40.
- Caus T, Rouvière P, Collart F, Mouly-Bandini A, Montiès J-R, Mesana T. Late results of double-valve replacement with biologic or mechanical prostheses. *Ann Thorac Surg* 2001;71(5 Suppl):S261–4.
- Mack MJ, Leon MB, Thourani VH, Makkar R, Kodali SK, Russo M *et al.* Transcatheter aortic-valve replacement with a balloon-expandable valve in low-risk patients. *N Engl J Med* 2019;380:1695–705.
- Bauerschmitt R, Bauer S, Liewald C, Emini R, Oechsner W, Beer M *et al.* First successful transcatheter double valve replacement from a transapical access and nine-month follow-up. *EuroIntervention* 2017;12:1645–8.
- Dvir D, Webb JG, Bleiziffer S, Pasic M, Waksman R, Kodali S *et al.* Transcatheter aortic valve implantation in failed bioprosthetic surgical valves. *JAMA* 2014;312:162–70.
- McElhinney DB, Aboulhosn JA, Dvir D, Whisenant B, Zhang Y, Eicken A *et al.*; VIVID Registry. Mid-term valve-related outcomes after transcatheter tricuspid valve-in-valve or valve-in-ring replacement. *J Am Coll Cardiol* 2019;73:148–57.
- Roy DA, Schaefer U, Guetta V, Hildick-Smith D, Mollmann H, Dumonteil N *et al.* Transcatheter aortic valve implantation for pure severe native aortic valve regurgitation. *J Am Coll Cardiol* 2013;61:1577–84.
- Ando T, Takagi H, Briasoulis A, Telila T, Slovut DP, Afonso L *et al.* A systematic review of reported cases of combined transcatheter aortic and mitral valve interventions. *Catheter Cardiovasc Interv* 2018;91:124–34.
- D'Onofrio A, Zucchetto F, Gerosa G. Simultaneous transapical aortic and mitral valve-in-valve implantation for double prostheses dysfunction: case report and technical insights. *Catheter Cardiovasc Interv* 2014;84:509–12.
- Elkharbotly A, Delago A, El-Hajjar M. Simultaneous transapical transcatheter aortic valve replacement and transcatheter mitral valve replacement for native valvular stenosis. *Catheter Cardiovasc Interv* 2016;87:1347–51.
- Fanari Z, Mahmaljy H, Nandish S, Goswami NJ. Simultaneous transcatheter transfemoral aortic and transeptal mitral valve replacement using Edward SAPIEN S3. *Catheter Cardiovasc Interv* 2018;92:988–92.
- Ribeiro HB, Doyle D, Urena M, Allende R, Amat-Santos I, Pasion S *et al.* Transapical mitral implantation of a balloon-expandable valve in native mitral valve stenosis in a patient with previous transcatheter aortic valve replacement. *JACC Cardiovasc Interv* 2014;7:e137–9.
- Schlomicher M, Haldenwang PL, Moustafine V, Bechtel M, Strauch JT. Simultaneous double valve-in-valve TAVI procedure for failed bioprostheses. *Ann Thorac Surg* 2015;99:722–4.
- Gaia DF, Breda JR, Duarte Ferreira CB, Marcondes de Souza JA, Macedo MT, Gimenes MV *et al.* New Braile Inovare transcatheter aortic prosthesis: clinical results and follow-up. *EuroIntervention* 2015;11:682–9.
- Gaia DF, Palma JH, Ferreira CB, Souza JA, Agreli G, Guilhen JC *et al.* Transapical aortic valve implantation: results of a Brazilian prosthesis. *Rev Bras Cir Cardiovasc* 2010;25:293–302.
- Gaia DF, Palma JH, Ferreira CB, Souza JA, Gimenes MV, Macedo MT *et al.* Transcatheter aortic valve implantation: results of the current development and implantation of a new Brazilian prosthesis. *Rev Bras Cir Cardiovasc* 2011;26:338–47.
- Yucel-Finn A, Nicol E, Leipsic JA, Weir-McCall JR. CT in planning transcatheter aortic valve implantation procedures and risk assessment. *Clin Radiol* 2019;S0009-9260(19)30660-9. doi: 10.1016/j.crad.2019.11.015.
- Bapat V, Pirone F, Kapetanakis S, Rajani R, Niederer S. Factors influencing left ventricular outflow tract obstruction following a mitral valve-in-valve or valve-in-ring procedure, part 1. *Catheter Cardiovasc Interv* 2015;86:747–60.
- Yoon SH, Bleiziffer S, Latib A, Eschenbach L, Ancona M, Vincent F *et al.* Predictors of left ventricular outflow tract obstruction after transcatheter mitral valve replacement. *JACC Cardiovasc Interv* 2019;12:182–93.
- Stone GW, Adams DH, Abraham WT, Kappetein AP, Genereux P, Vranckx P *et al.* Clinical trial design principles and endpoint definitions for transcatheter mitral valve repair and replacement: part 2: endpoint definitions: a consensus document from the Mitral Valve Academic Research Consortium. *J Am Coll Cardiol* 2015;66:308–21.
- Kappetein AP, Head SJ, Genereux P, Piazza N, van Mieghem NM, Blackstone EH *et al.* Updated standardized endpoint definitions for transcatheter aortic valve implantation: the Valve Academic Research Consortium-2 consensus document (VARC-2). *Eur J Cardiothorac Surg* 2012;42:S45–60.
- D'Ancona G, Kische S, Senges J, Ouarrak T, Puls M, Bekeredjian R *et al.* Combined mitro-aortic pathology: impact of previous aortic valve replacement upon outcomes of MitraClip therapy (from the German transcatheter mitral valve interventions registry). *EuroIntervention* 2017;13:475–82.
- Yoon SH, Whisenant BK, Bleiziffer S, Delgado V, Dhoble A, Schofer N *et al.* Outcomes of transcatheter mitral valve replacement for degenerated bioprostheses, failed annuloplasty rings, and mitral annular calcification. *Eur Heart J* 2019;40:441–51.
- da Costa LPN, Palma JH, Barbosa Ribeiro H, Sampaio RO, Viotto G, Medeiros Santos R *et al.* Transcatheter mitral valve-in-valve implantation: reports of the first 50 cases from a Latin American Centre. *Interact CardioVasc Thorac Surg* 2020;30:229–35.
